# Supplementary material for: Decoding and reprogramming fungal iterative nonribosomal peptide synthetases
Source: PubMed Central journal article supplement (PMC5457498; doi:10.1038/ncomms15349), 2017-05-23
Supplement: ncomms15349-s1.pdf [file ncomms15349-s1.pdf]

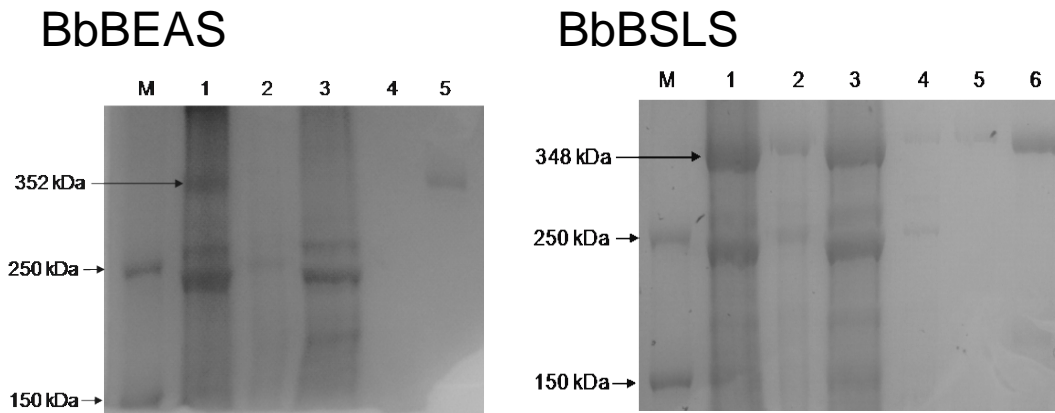

**Supplementary Figure 1 | SDS-PAGE analysis of the expression and purification of BbBEAS from *S. cerevisiae* BJ5465-NpgA/pDY37 (left) and BbBSLS from *S. cerevisiae* BJ5465-NpgA/pDY42 (right). M: Protein ladder, 1: Soluble fraction of the lysate, 2: Insoluble fraction of the lysate, 3: Flow through, 4-6: Eluents by buffer A with 10, 100 and 250 mM imidazole, respectively.**

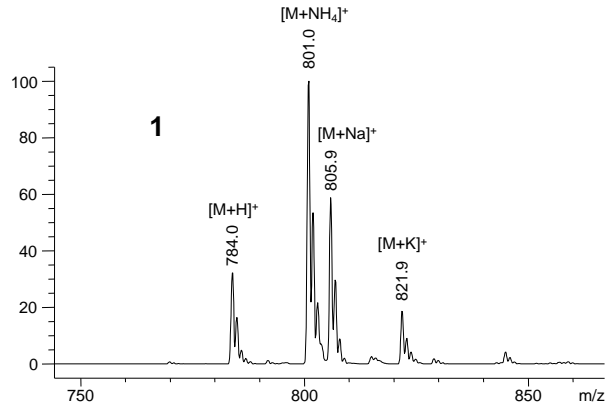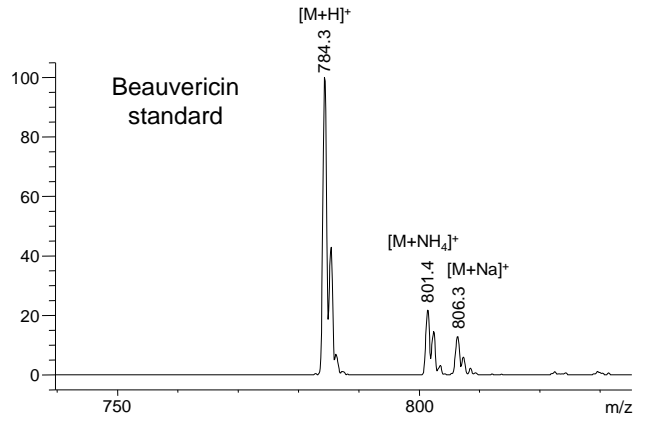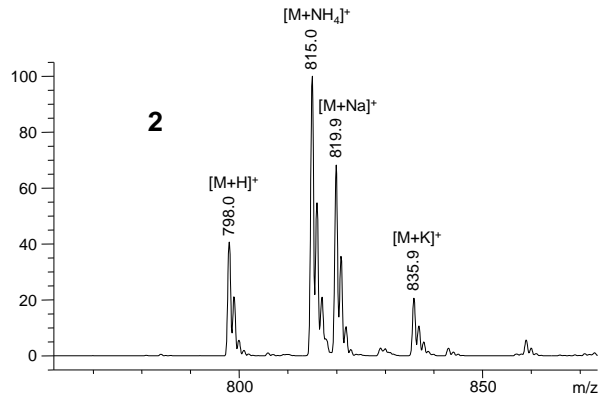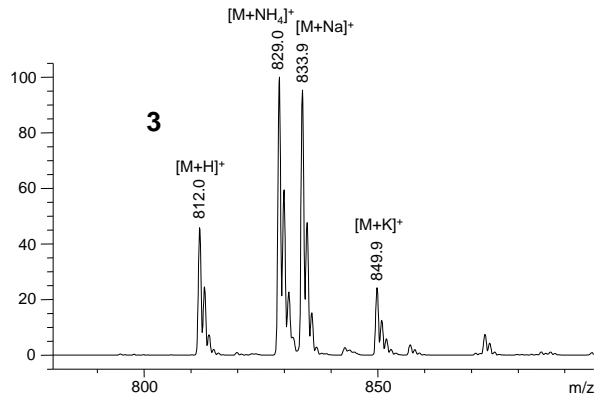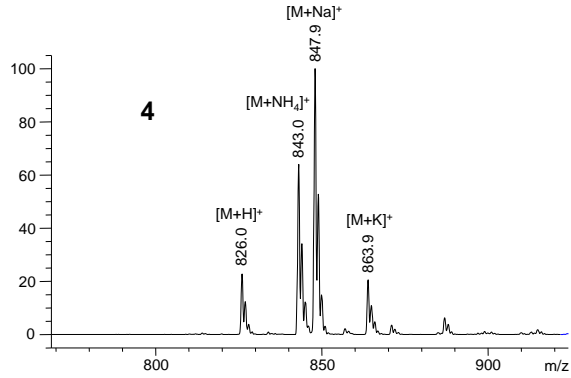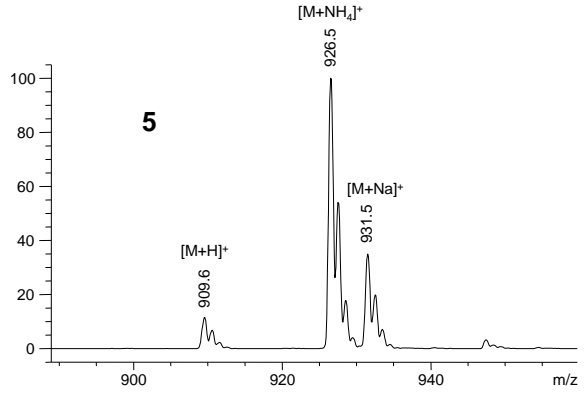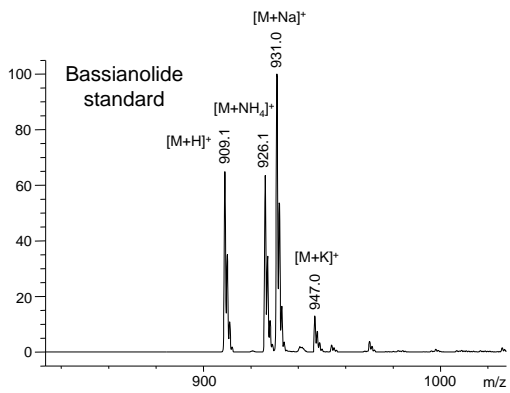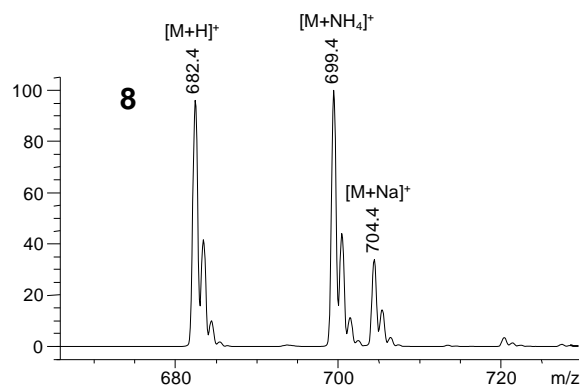

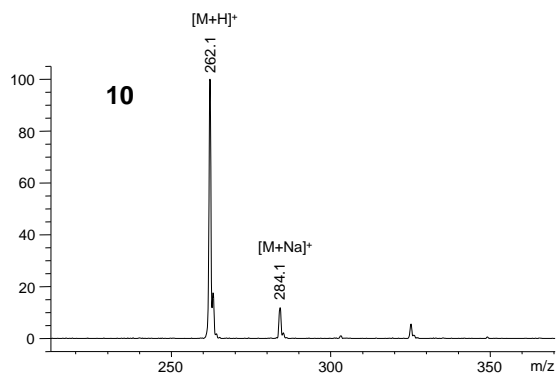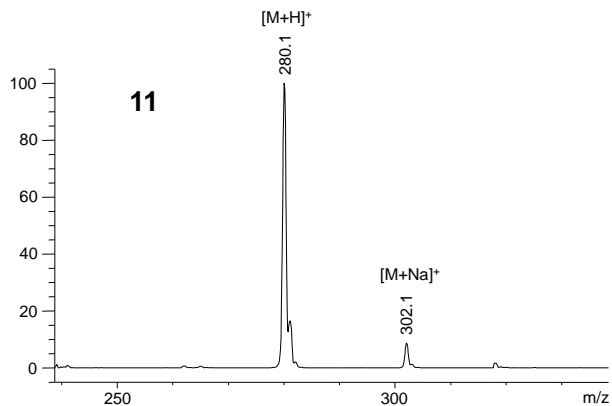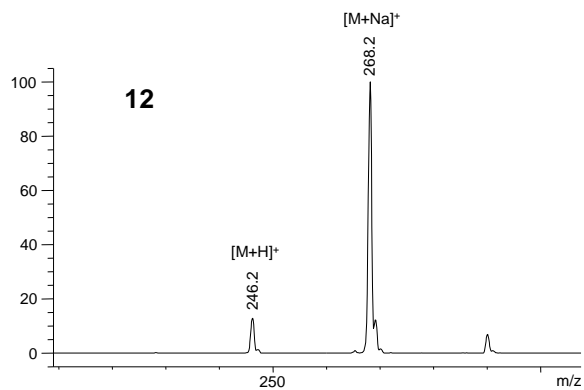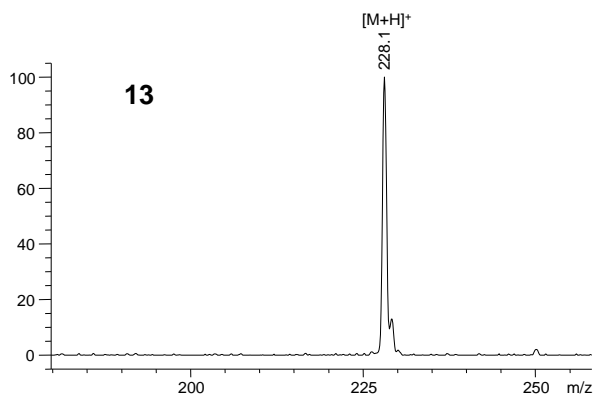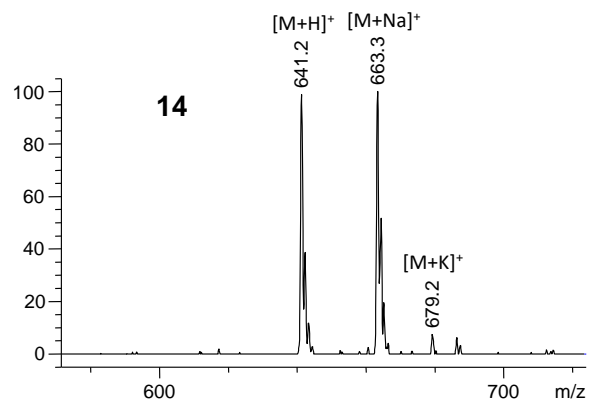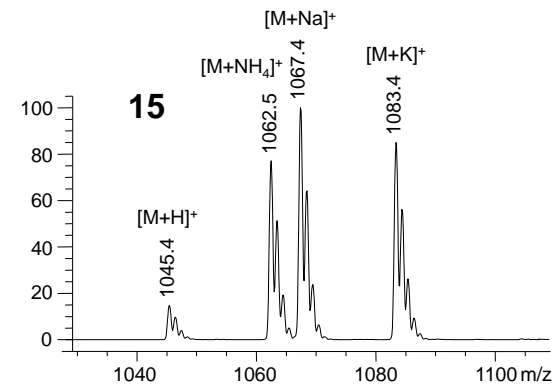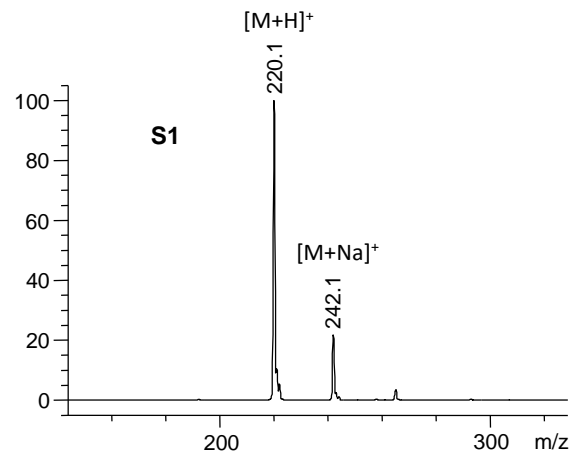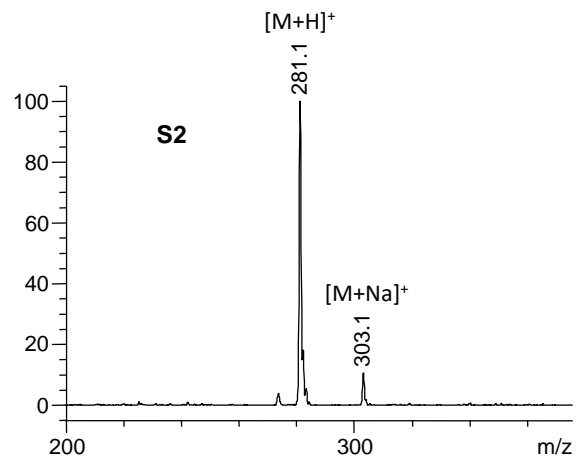

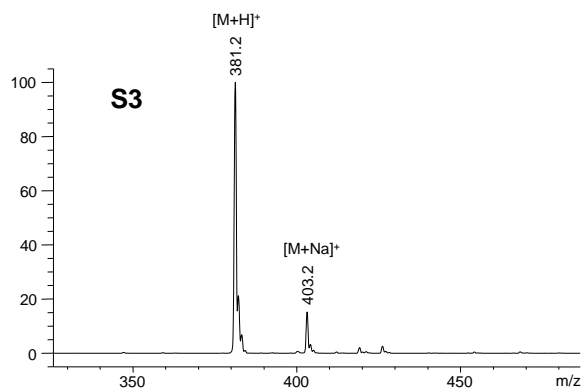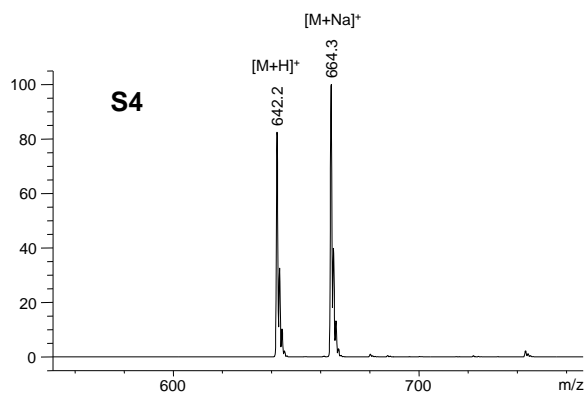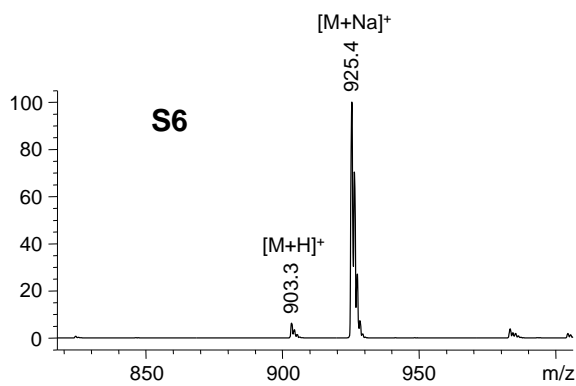

**Supplementary Figure 2 | ESI-MS (+) spectra of compounds synthesized (S1 and S2) or biosynthesized (1-5, 8, 10-15, S3, S4 and S6) in this work and the authentic samples of beauvericin and bassianolide.**

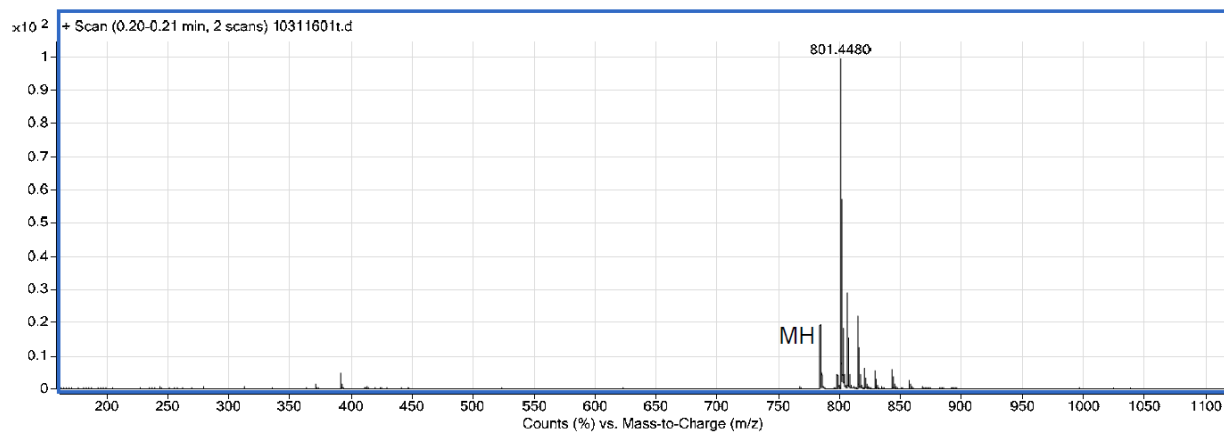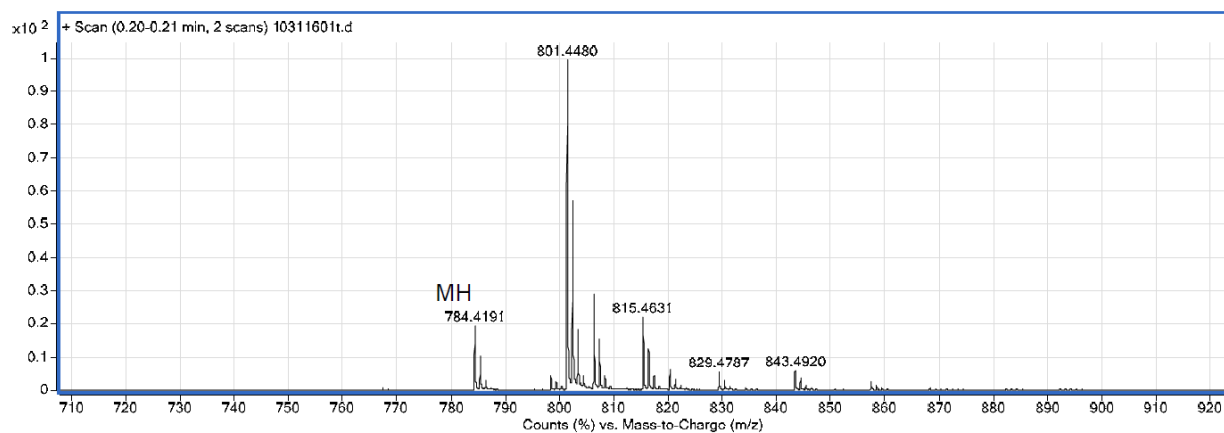

**Supplementary Figure 3 | High resolution ESI-MS of 1 generated in the *in vitro* reaction of BbBEAS.**

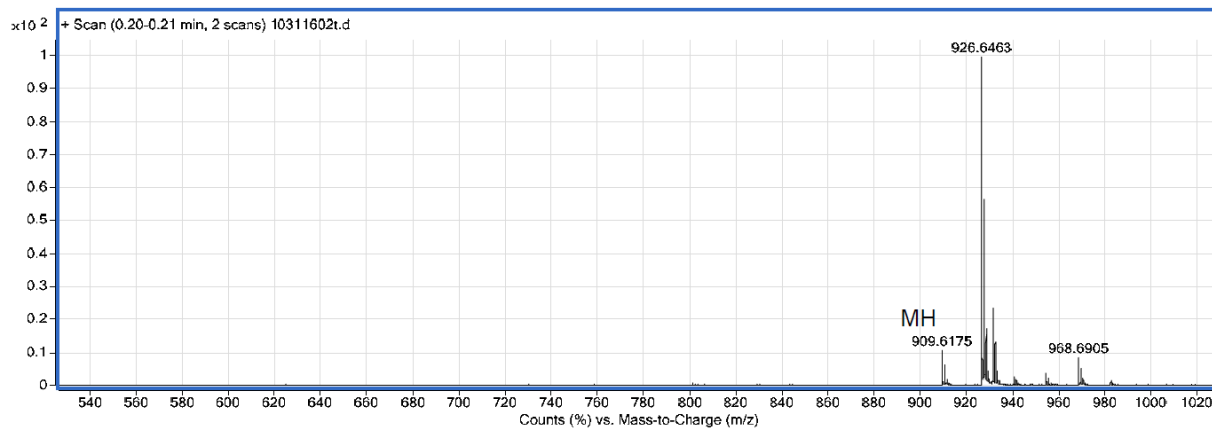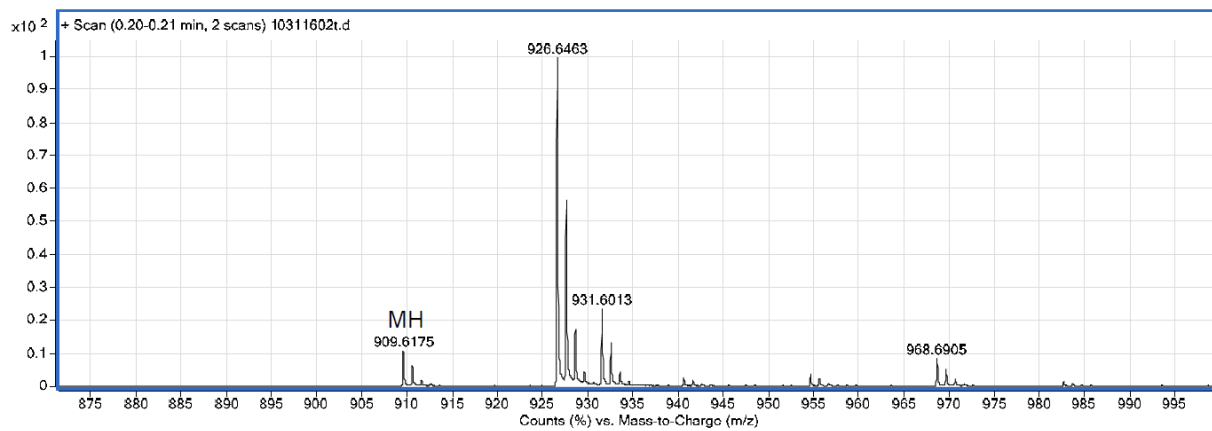

**Supplementary Figure 4 | High resolution ESI-MS of 5 generated in the *in vitro* reaction of BbBSLS.**

```

BbBEAS-T2a VALCEEATATFGMQ-VGISDHFFKLGGHSL1LATKLI SRVGDRLKARLTVKDVFDHPIFSELA
BbBSLS-T2a VMLCEELTKTFEMD-VNITDDFFQLGGHSL1LATRLVARI SHRLGARLTVKDVFDYPVFSELA
BbBEAS-T2b TMLCEEFANVLGMD-VGVTDNFFDLGGHSL1MATKLAARIGRRLNTTISVKEVFEHPPIVFQLA
BbBSLS-T2b AMLCEEFANILGMD-VGITDNFFDLGGHSL1MATRLAARIGHRLNTTISVKDIFSHPVIFQLS
TycC-T3 SKLAEIWERVLGVSGIGILDNFFQIGGHSL1KAMAVAAQVHREYQVELPLKVLFAQPTIKALA
GrsB-T3 GKLEEIWKDVLGLQRVGIHDDFFTIGGHSL1KAMAVISQVHKECQTEVPLRVLFETPTIQGLA

```

**Supplementary Figure 5 | Amino acid sequence alignment of the twin T<sub>2</sub> domains of BbBEAS and BbBSLS with TycC-T<sub>3</sub> and GrsB-T<sub>3</sub>.** TycC-T<sub>3</sub> is a T domain from TycC (tyrocidine synthetase 3, GenBank accession number AAC45930) and GrsB-T<sub>3</sub> is from GrsB (gramicidin S synthetase 2, GenBank accession number BAA06146). The conserved motif (I/L)GG(D/H)SL is highlighted and the key Ser residue is boxed.

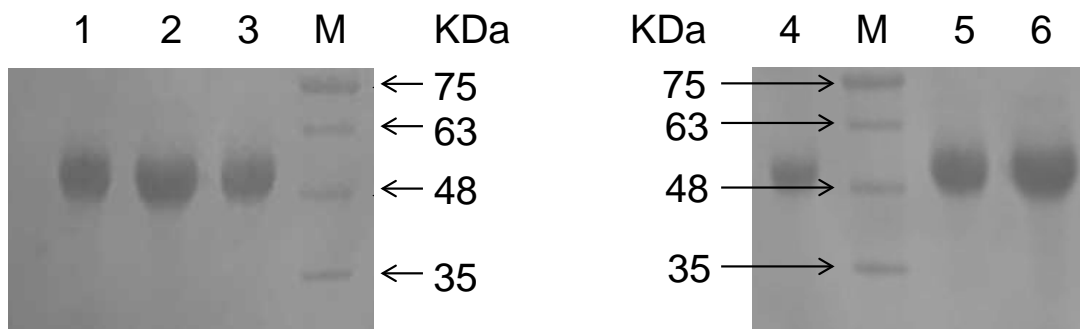

**Supplementary Figure 6 | SDS-PAGE analysis of the purified C<sub>1</sub>, C<sub>2</sub>, C<sub>3</sub> and MT domains from *E. coli* BL21(DE3).** M: Protein ladder, 1: C<sub>1</sub>(BbBEAS), 2: C<sub>3</sub>(BbBEAS), 3: C<sub>3</sub>(BbBEAS-H2901A), 4: MT<sub>(BbBEAS)</sub>, 5: C<sub>3</sub>(BbBSLS), 6: C<sub>2</sub>(BbBEAS).



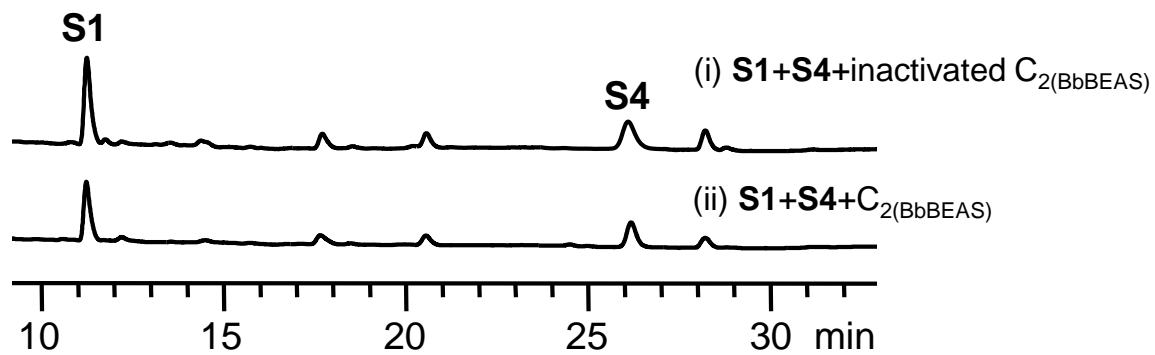

**Supplementary Figure 7 | HPLC analysis of the reaction of C<sub>2</sub>(BbBEAS) with S1 and S4. (i)**

**S1+S4+inactivated C<sub>2</sub>(BbBEAS); (ii) S1+S4+C<sub>2</sub>(BbBEAS).**

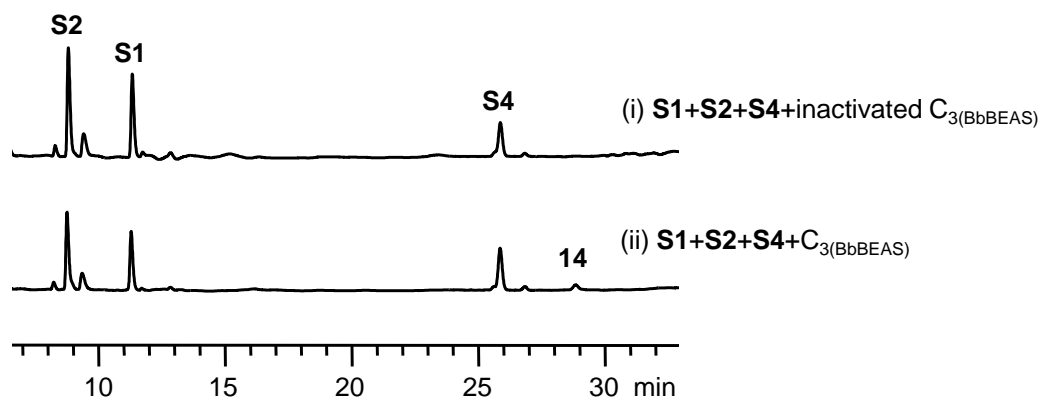

**Supplementary Figure 8 | HPLC analysis of the reaction of C<sub>3</sub>(BbBEAS) with S1, S2 and S4. (i)**

**S1+S2+S4+inactivated C<sub>3</sub>(BbBEAS); (ii) S1+S2+S4+C<sub>3</sub>(BbBEAS).**

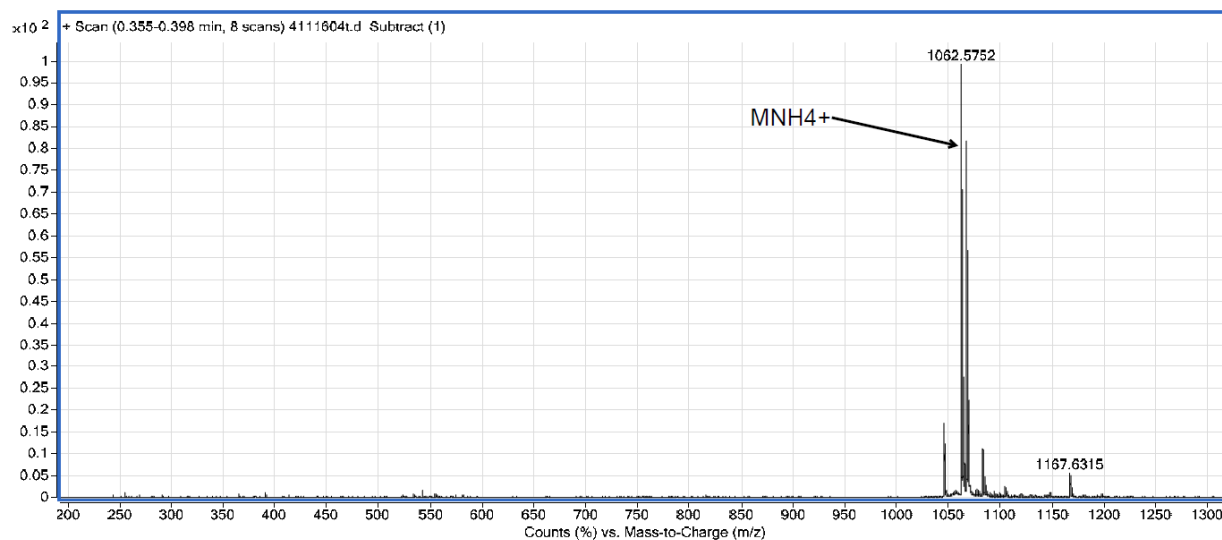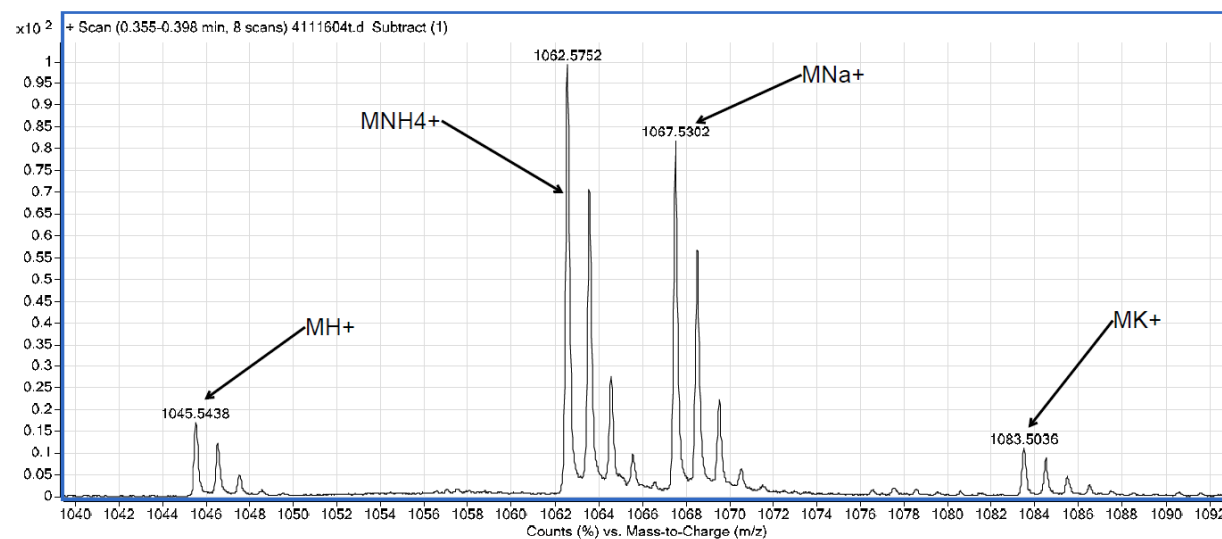

**Supplementary Figure 9 | High resolution ESI-MS of FX1 (15).**

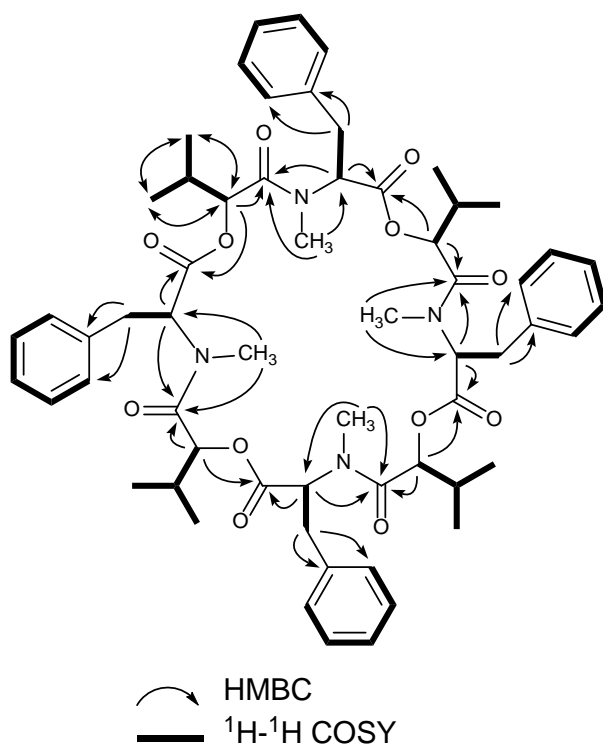

Supplementary Figure 10 | Selected HMBC and  $^1\text{H}$ - $^1\text{H}$  COSY correlations for FX1 (15).

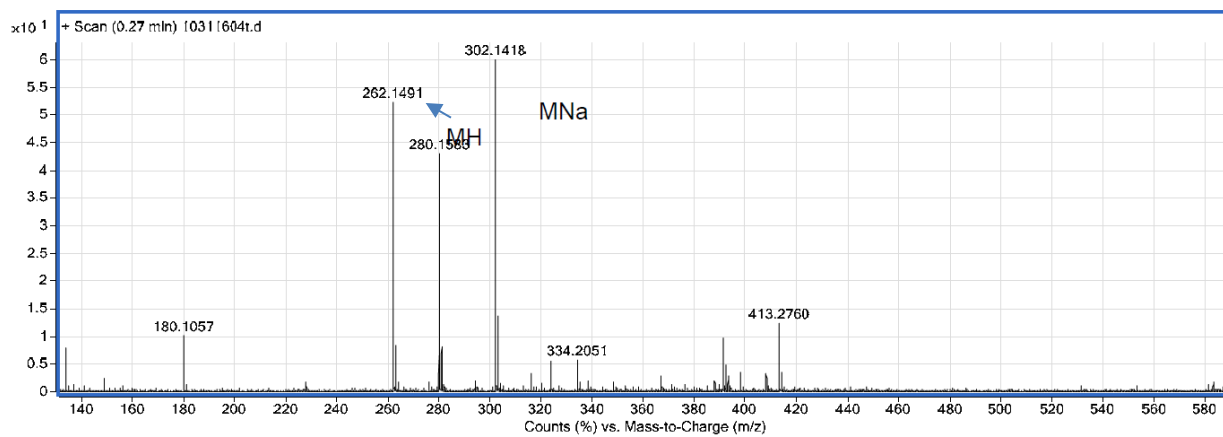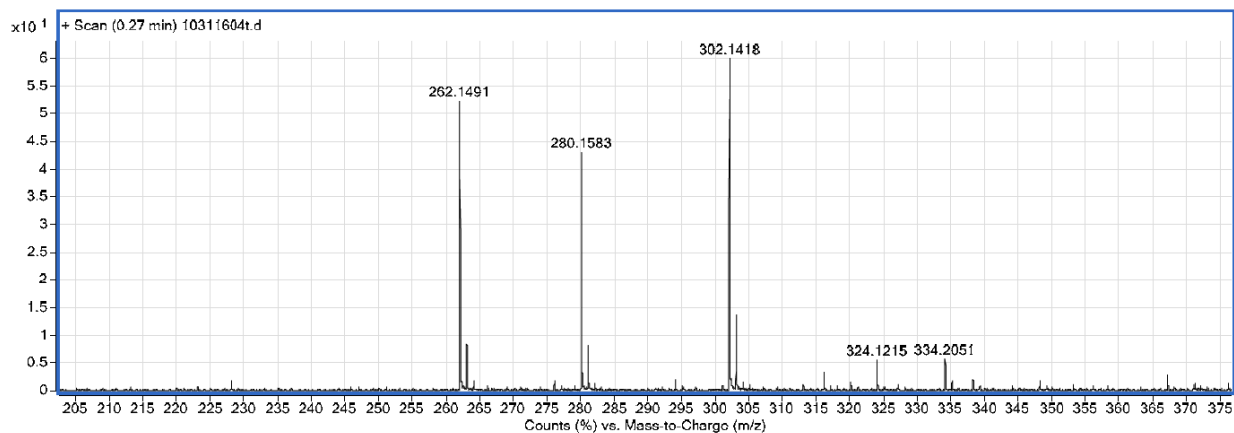

**Supplementary Figure 11 | High resolution ESI-MS of D-Hiv-N-Me-L-Phe (11) obtained by hydrolysis of 15 with 0.1 N NaOH.**

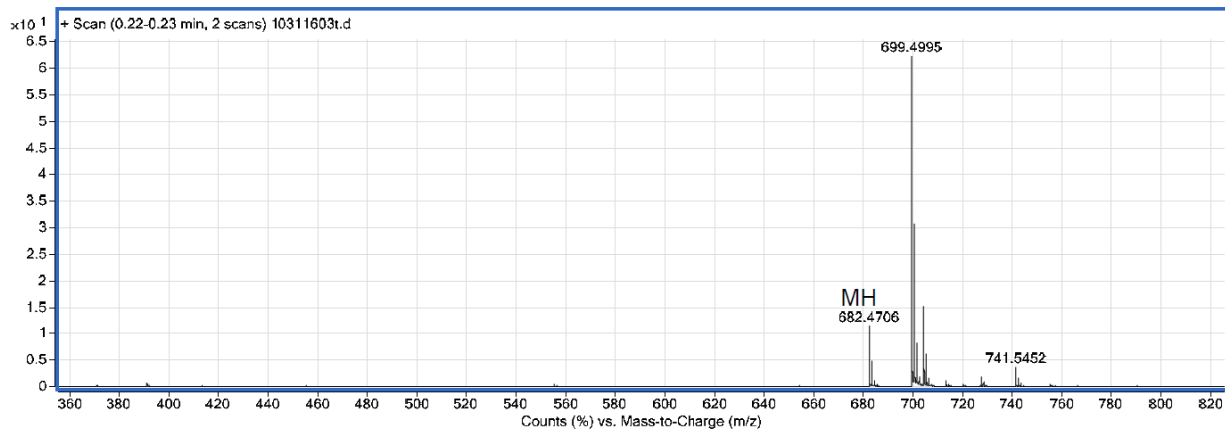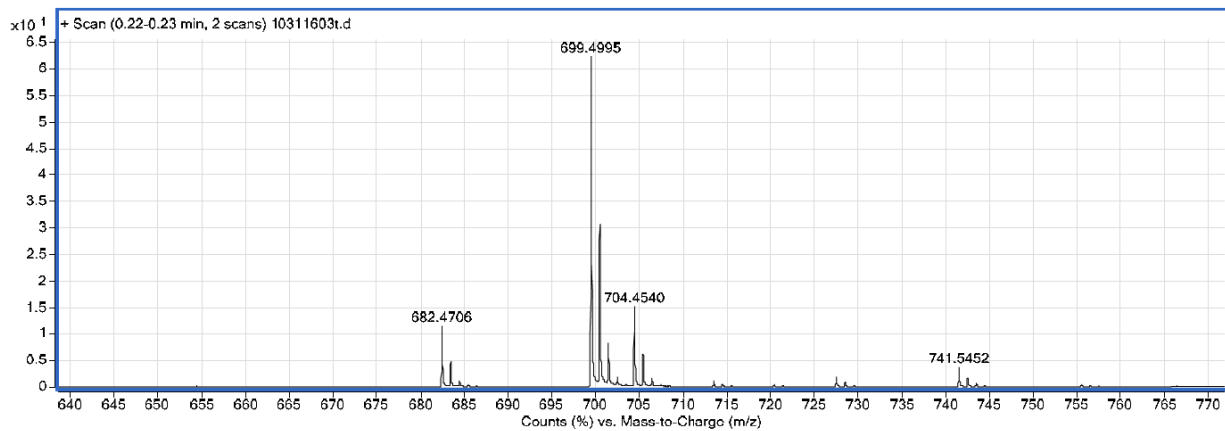

**Supplementary Figure 12 | High resolution ESI-MS of enniatin C (8) generated by C<sub>1</sub>-A<sub>1</sub>-T<sub>1</sub>-C<sub>2</sub>-A<sub>2</sub>-MT-T<sub>2a</sub>-T<sub>2b</sub>(BbBSLS)-C<sub>3</sub>(BbBEAS) in the yeast.**

**Supplementary Table 1 | NMR data for 8, 10, 11 and 15.**

| Compound                                      | NMR data                                                                                                                                                                                                                                                                                                                                                                                                                                                                                                                                                                                                                                                                                                                                                                                                                                                                                                                                                                                                                                                                                                                                                                                                                                                                                                                                                                                                                                                                                                                                                                                                                                                                                                                                                                |
|-----------------------------------------------|-------------------------------------------------------------------------------------------------------------------------------------------------------------------------------------------------------------------------------------------------------------------------------------------------------------------------------------------------------------------------------------------------------------------------------------------------------------------------------------------------------------------------------------------------------------------------------------------------------------------------------------------------------------------------------------------------------------------------------------------------------------------------------------------------------------------------------------------------------------------------------------------------------------------------------------------------------------------------------------------------------------------------------------------------------------------------------------------------------------------------------------------------------------------------------------------------------------------------------------------------------------------------------------------------------------------------------------------------------------------------------------------------------------------------------------------------------------------------------------------------------------------------------------------------------------------------------------------------------------------------------------------------------------------------------------------------------------------------------------------------------------------------|
| Enniatin C ( <b>8</b> )                       | <sup>1</sup> H NMR (300 MHz, CDCl <sub>3</sub> ): δ 5.27 (3H, dd, <i>J</i> = 5.4,10.8 Hz), 4.93 (3H, d, <i>J</i> = 8.7 Hz), 3.10 (9H, s), 2.22 (3H, m), 1.75 (3H, m), 1.65 (3H, m), 1.47 (3H, m), 1.00 (9H, d, <i>J</i> = 6.6 Hz), 0.94 (9H, d, <i>J</i> = 6.3 Hz), 0.93 (9H, d, <i>J</i> = 6.9 Hz), 0.91 (9H, d, <i>J</i> = 6.6 Hz)                                                                                                                                                                                                                                                                                                                                                                                                                                                                                                                                                                                                                                                                                                                                                                                                                                                                                                                                                                                                                                                                                                                                                                                                                                                                                                                                                                                                                                    |
| Cyclo-D-Hiv- <i>N</i> -Me-L-Phe ( <b>10</b> ) | <sup>1</sup> H NMR (300 MHz, CDCl <sub>3</sub> ): δ 7.31-7.34 (3H, m), 7.10-7.14 (2H, m), 4.40 (1H, t, <i>J</i> = 4.5 Hz), 3.30 (1H, dd, <i>J</i> = 4.1, 14.1 Hz), 3.19 (1H, dd, <i>J</i> = 4.5, 14.1 Hz), 3.02 (3H, s), 3.00 (1H, d, <i>J</i> = 2.4 Hz), 2.28-2.35 (1H, m), 0.84 (3H, d, <i>J</i> = 7.2 Hz), 0.76 (3H, d, <i>J</i> = 6.6 Hz)<br><br><sup>13</sup> C NMR (75 MHz, CDCl <sub>3</sub> ): δ 167.4, 165.6, 134.2, 129.8 (2×), 129.3 (2×), 128.3, 81.4, 62.8, 37.2, 32.5, 29.8, 18.7, 15.2                                                                                                                                                                                                                                                                                                                                                                                                                                                                                                                                                                                                                                                                                                                                                                                                                                                                                                                                                                                                                                                                                                                                                                                                                                                                   |
| D-Hiv- <i>N</i> -Me-L-Phe ( <b>11</b> )       | <sup>1</sup> H NMR (300 MHz, CDCl <sub>3</sub> ): δ 7.10-7.34 (5H, m), 4.41 (1H, t, 4.3), 3.28 (1H, dd, <i>J</i> = 4.1, 14.0 Hz), 3.21 (1H, dd, <i>J</i> = 4.6, 14.0 Hz), 3.02 (3H, s), 3.00 (1H, d, <i>J</i> = 2.1 Hz), 2.27-2.37 (1H, m), 0.84 (3H, d, <i>J</i> = 7.1 Hz), 0.76 (3H, d, <i>J</i> = 6.9 Hz)<br><br><sup>13</sup> C NMR (75 MHz, CDCl <sub>3</sub> ): δ 168.1, 165.8, 134.2, 129.9 (2×), 129.4 (2×), 128.7, 81.5, 63.0, 37.3, 32.6, 29.9, 18.8, 15.3                                                                                                                                                                                                                                                                                                                                                                                                                                                                                                                                                                                                                                                                                                                                                                                                                                                                                                                                                                                                                                                                                                                                                                                                                                                                                                    |
| FX1 ( <b>15</b> )                             | <sup>1</sup> H NMR (500 MHz, CD <sub>3</sub> OD): δ 7.21-7.39 (20H, m, phenyl-CH of Phe), 6.02 (1H, dd, <i>J</i> = 3.5, 13.4 Hz, α-CH of Phe), 5.98 (1H, dd, <i>J</i> = 3.0, 12.9 Hz, α-CH of Phe), 5.70 (1H, dd, <i>J</i> = 2.9, 12.8 Hz, α-CH of Phe), 5.11-5.42 (4H, m, α-CH of Hiv), 5.20 (1H, dd, <i>J</i> = 4.0, 11.7 Hz, α-CH of Phe), 3.54-3.58 (2H, m, β-CH of Phe), 3.44-3.50 (2H, m, β-CH of Phe), 3.22 (3H, s, <i>N</i> -CH <sub>3</sub> ), 3.06 (3H, s, <i>N</i> -CH <sub>3</sub> ), 3.08 (3H, s, <i>N</i> -CH <sub>3</sub> ), 2.90-3.10 (4H, m, β-CH of Phe), 2.81 (3H, s, <i>N</i> -CH <sub>3</sub> ), 1.51-1.70 (4H, m, β-CH of Hiv), 0.89 (3H, d, <i>J</i> = 6.1 Hz, γ-CH <sub>3</sub> of Hiv), 0.71 (3H, d, <i>J</i> = 6.1 Hz, γ-CH <sub>3</sub> of Hiv), 0.65 (3H, d, <i>J</i> = 6.0 Hz, γ-CH <sub>3</sub> of Hiv), 0.60 (3H, d, <i>J</i> = 7.3 Hz, γ-CH <sub>3</sub> of Hiv), 0.58 (3H, d, <i>J</i> = 7.2 Hz, γ-CH <sub>3</sub> of Hiv), 0.55 (3H, d, <i>J</i> = 6.9 Hz, γ-CH <sub>3</sub> of Hiv), 0.48 (3H, d, <i>J</i> = 6.6 Hz, γ-CH <sub>3</sub> of Hiv), 0.28 (3H, d, <i>J</i> = 6.1 Hz, γ-CH <sub>3</sub> of Hiv)<br><br><sup>13</sup> C NMR (125 MHz, CD <sub>3</sub> OD): δ 173.4, 172.8, 172.1, 171.9, 171.0, 170.9, 170.7, 170.5 (C=O), 138.6, 138.3, 138.0, 137.5 (γ-C of Phe), 131.0 (2×CH), 130.9 (2×CH), 130.3 (4×CH), 130.1 (2×CH), 130.0 (2×CH), 129.9 (2×CH), 129.7 (2×CH), 128.2 (2×CH), 128.1 (2×CH) (phenyl-CH of Phe), 78.9, 77.2, 76.7, 76.5 (α-CH of Hiv), 62.0, 59.7, 59.4, 58.8 (α-CH of Phe), 35.9, 35.8, 32.6, 32.5 (CH <sub>2</sub> of Phe), 29.1, 29.0, 27.0, 26.9 (β-CH of Hiv), 31.8, 31.7, 31.2, 31.1 ( <i>N</i> -CH <sub>3</sub> of Phe), 20.4, 19.5, 19.2, 18.9, 18.4, 17.0, 16.5, 15.4 (CH <sub>3</sub> of Hiv) |

**Supplementary Table 2 | Primers used in this study.**

| No. | Primer                                                                                 | Sequence                                        | Restriction site(s) |
|-----|----------------------------------------------------------------------------------------|-------------------------------------------------|---------------------|
| 1   | C <sub>3</sub> (BbBEAS)-NheI-F                                                         | 5'-aaGCTAGCatggagctgggtcagttggagag-3'           | <i>NheI</i>         |
| 2   | BbBEAS-B-PmlI-wostop-R                                                                 | 5'-aaCACGTGcaaagccgagtttagactct-3'              | <i>PmlI</i>         |
| 3   | BbBEAS-M1-NdeI-F                                                                       | 5'-aaCATATGgagccgctcaaaaatgt-3'                 | <i>NdeI</i>         |
| 4   | T <sub>2b</sub> (BbBEAS)-withstop-PmeI-R                                               | 5'-aaGTTTAAACtcaaataccgcatgtgcacatt-3'          | <i>PmeI</i>         |
| 5   | C <sub>1</sub> (BbBEAS)-withstop-PmeI-R                                                | 5'-aaGTTTAAACtcagctctcgcgagtcacaatgt-3'         | <i>PmeI</i>         |
| 6   | BbBSLS-M1-NdeI-F                                                                       | 5'-aaCATATGgagccaccaacaacgc-3'                  | <i>NdeI</i>         |
| 7   | C <sub>1</sub> (BbBSLS)-withstop-PmeI-R                                                | 5'-aaGTTTAAACtcacagtggttcggaattccagc-3'         | <i>PmeI</i>         |
| 8   | T <sub>2a</sub> T <sub>2b</sub> C <sub>3</sub> (BbBEAS)-NheI-F                         | 5'-aaGCTAGCatgctgctcgtagagcccggac-3'            | <i>NheI</i>         |
| 9   | T <sub>2b</sub> C <sub>3</sub> (BbBEAS)-NheI-F                                         | 5'-aaGCTAGCatgctcgcgaggggctgcaaacgt-3'          | <i>NheI</i>         |
| 10  | C <sub>3</sub> (BbBSLS)-NdeI-F                                                         | 5'-aaCATATGgaggtttctcaattggaaag-3'              | <i>NdeI</i>         |
| 11  | A <sub>2</sub> MT(BbBEAS)-wistop-PmeI-R                                                | 5'-aaGTTTAAACtcacatgcaacctcaatgctcgtga-3'       | <i>PmeI</i>         |
| 12  | A <sub>1</sub> (BbBEAS)-NdeI-SpeI-F                                                    | 5'-aaCATATGACTAGTctccagattctgcaagagtc-3'        | <i>NdeI, SpeI</i>   |
| 13  | T <sub>2a</sub> (BbBEAS)withstop-PmeI-R                                                | 5'-aaGTTTAAACtcacatcgtttccatttcattgc-3'         | <i>PmeI</i>         |
| 14  | T <sub>2b</sub> (BbBSLS)-wostop-PmlI-R                                                 | 5'-aaCACGTGcatgtcctgtgaaaagttga-3'              | <i>PmlI</i>         |
| 15  | BbBSLSM1-SpeI-F                                                                        | 5'-aaACTAGTatggagccaccaacaacgc-3'               | <i>SpeI</i>         |
| 16  | BbBSLSM3-PmeI-withstop-R                                                               | 5'-aaGTTTAAACtcataaagacgattcaaac-3'             | <i>PmeI</i>         |
| 17  | A <sub>1</sub> (BbBSLS)-SpeI-F                                                         | 5'-aaACTAGTccaccagttctcgaagagtc-3'              | <i>SpeI</i>         |
| 18  | BbBSLS-B-PmlI-wostop-R                                                                 | 5'-aaCACGTGtaaagacgattcaaacct-3'                | <i>PmlI</i>         |
| 19  | BSLS-M1-5-SpeI                                                                         | 5'-aaACTAGTatggagccaccaacaacgc-3'               | <i>SpeI</i>         |
| 20  | BSLS-A2MTwithlinker-withstop-PmlI                                                      | 5'-aaCACGTGtcagctcagtgaaacgccggcgcctcgtgg-3'    | <i>PmlI</i>         |
| 21  | BSLS-T2aT2bC3linker-5-NdeI                                                             | 5'-aaCATATGctgtctcgcagggccaagc-3'               | <i>NdeI</i>         |
| 22  | BSLSM3-3-PmeI-withstop                                                                 | 5'-aaGTTTAAACtcataaagacgattcaaac-3'             | <i>PmeI</i>         |
| 23  | BSLS-T2bC3linker-5-NdeI                                                                | 5'-aaCATATGcgtcaacagttggcctcga-3'               | <i>NdeI</i>         |
| 24  | BSLS-T2awithlinker-withstop-PmlI                                                       | 5'-aaCACGTGtcacatgcttccatgctcgtag-3'            | <i>PmlI</i>         |
| 25  | BbBEAS-H2901A-F                                                                        | 5'-gagtctgtcttcttcttctcggccctctat-3'            |                     |
| 26  | BbBEAS-H2901A-R                                                                        | 5'-gtactgaagacgcctgcttgagaatggtg-3'             |                     |
| 27  | BbBEAS-D179A-F                                                                         | 5'-atcttgactcgtggccagcaccgttcag-3'              |                     |
| 28  | BbBEAS-D179A-R                                                                         | 5'-gaaatacccaaatcagcagttgttctctg-3'             |                     |
| 29  | BbBSLS-H170A-F                                                                         | 5'-ttctgtatggacattcagcgcctctttgtcagcag-3'       |                     |
| 30  | BbBSLS-H170A-R                                                                         | 5'-ctcgtctcttgaattgggttctccgtaaggacatat-3'      |                     |
| 31  | BbBSLS-H2861A-F                                                                        | 5'-gtcctttgtggtatcagctgcttgtatgatgctt-3'        |                     |
| 32  | BbBSLS-H2861A-R                                                                        | 5'-tctcacagacgatgctgcttcagaaccttgactgt-3'       |                     |
| 33  | BbBEAS-S2591A-F                                                                        | 5'-tcaaacctggcggctatgctctgctgctacaaaac-3'       |                     |
| 34  | BbBEAS-S2591A-R                                                                        | 5'-aaaagtgatcgtgatccgactgcatccaacgt-3'          |                     |
| 35  | BbBSLS-D174A-F                                                                         | 5'-agccactctttgtcggcagtgcttcca-3'               |                     |
| 36  | BbBSLS-D174A-R                                                                         | 5'-gaatgtccatacaagaactcgtctcttgaa-3'            |                     |
| 37  | BbBEAS-S2688A-F                                                                        | 5'-tttttgacctcgggtggcagtcgctcatggcgaca-3'       |                     |
| 38  | BbBEAS-S2688A-R                                                                        | 5'-gttgctcgtgactccgacatccatccaaggacatt-3'       |                     |
| 39  | Linker(T <sub>2a</sub> )linker(T <sub>2b</sub> )T <sub>2b</sub> C <sub>3</sub> -SOE1-R | 5'-cgacgttttgacgcccctcgcgtgcaacctcaatgctcgtg-3' |                     |
| 40  | Linker(T <sub>2a</sub> )linker(T <sub>2b</sub> )T <sub>2b</sub> C <sub>3</sub> -SOE2-F | 5'-cagcgacattgaggttgacgcggaggggctgcaaacgtcg-3'  |                     |
| 41  | BbBEAS-AscI7195-F                                                                      | 5'-aaactagatGGCGCGCCctggatatccgccgt-3'          | <i>AscI</i>         |
| 42  | BbBEAS with T <sub>2a</sub> T <sub>2b</sub> C <sub>3</sub> (BbBSLS)-F                  | 5'-cccggacgacgacgatggtgcaaaagtggcacc-3'         |                     |
| 43  | BbBEAS with T <sub>2a</sub> T <sub>2b</sub> C <sub>3</sub> (BbBSLS)-R                  | 5'-ggtgccgactttgcaccatgctcgtcgtccggg-3'         |                     |
| 44  | BbBEAS with T <sub>2b</sub> C <sub>3</sub> (BbBSLS)-F                                  | 5'-ctttgaatggtggtggaggccaggacaagaaaga-3'        |                     |
| 45  | BbBEAS with T <sub>2b</sub> C <sub>3</sub> (BbBSLS)-R                                  | 5'-tctttctgtcctggcctccaccaccattcaaac-3'         |                     |
| 46  | BbBEAS with C <sub>3</sub> (BbBSLS)-F                                                  | 5'-aacactgcgtttcaactatcccgcggcagtc-3'           |                     |
| 47  | BbBEAS with C <sub>3</sub> (BbBSLS)-R                                                  | 5'-gcatcggcggcgggaatgagtgaaacgcagtg-3'          |                     |
| 48  | BbBSLS-BsrGI6843-F                                                                     | 5'-aaTGTACActtgctcggctcagac-3'                  | <i>BsrGI</i>        |
| 49  | BbBSLS with T <sub>2a</sub> T <sub>2b</sub> C <sub>3</sub> (BbBEAS)-F                  | 5'-ccaaagctatcaaaaagacgaagaaaagaagcc-3'         |                     |



|    |                                                                       |                                         |                |
|----|-----------------------------------------------------------------------|-----------------------------------------|----------------|
| 50 | BbBSLS with T <sub>2a</sub> T <sub>2b</sub> C <sub>3</sub> (BbBEAS)-R | 5'-ggcttcttttctcgtcttttgatagcttgg-3'    |                |
| 51 | BbBSLS with T <sub>2b</sub> C <sub>3</sub> (BbBEAS)-F                 | 5'-ctcggccgggtgggtcaagcgaagcaagggtc-3'  |                |
| 52 | BbBSLS with T <sub>2b</sub> C <sub>3</sub> (BbBEAS)-R                 | 5'-gaccctgcttcgcttgaccaccaccggccgaag-3' |                |
| 53 | BbBSLS with C <sub>3</sub> (BbBEAS)-F                                 | 5'-acactgcctccagctctgtctgtgaagattt-3'   |                |
| 54 | BbBSLS with C <sub>3</sub> (BbBEAS)-R                                 | 5'-aaatctcaacagacaagagctggaaggcagtgt-3' |                |
| 55 | C <sub>1</sub> (BbBEAS)-withstop-BamHI-R                              | 5'-aaGGATCCtcagtcctcgcgagtcacaatgt-3'   | <i>BamHI</i>   |
| 56 | C <sub>3</sub> (BbBEAS)-NheI-pET-F                                    | 5'-aaGCTAGCcatggagctgggtcagttggagag-3'  | <i>NheI</i>    |
| 57 | BbBEAS-B-R-BamHI                                                      | 5'-aaGGATCCtcacaaagccgagtttagactct-3'   | <i>BamHI</i>   |
| 58 | C <sub>3</sub> (BbBSLS)-NdeI-pET-F                                    | 5'-aaCATATGcagcaatgttttctacgc-3'        | <i>NdeI</i>    |
| 59 | BbBSLSM3-BamHI-withstop-R                                             | 5'-aaGGATCCtcataaagacgattcaag-3'        | <i>BamHI</i>   |
| 60 | C <sub>2</sub> (BbBEAS)-NdeI-F                                        | 5'-aaCATATGagcggcgattctacgcctc-3'       | <i>NdeI</i>    |
| 61 | C <sub>2</sub> (BbBEAS)-HindIII-R                                     | 5'-aaAAGCTTtcagctgtcagctccttaacc-3'     | <i>HindIII</i> |
| 62 | MT <sub>(BbBEAS)</sub> -NdeI-F                                        | 5'-aaCATATGgctgacgatgccgttgagca-3'      | <i>NdeI</i>    |
| 63 | MT <sub>(BbBEAS)</sub> -BamHI-R                                       | 5'-aaGGATCCtactgcagccgctgcagcggcc-3'    | <i>BamHI</i>   |

**Supplementary Table 3 | Plasmids constructed in this study.**

| Plasmid | Description                                      | Primers       |
|---------|--------------------------------------------------|---------------|
| pDY83   | $C_3(bbBeas)$ in pJET1.2                         | 1, 2          |
| pDY85   | $bbBeas-\Delta C_3(PmeI)$ in pJET1.2             | 3, 4          |
| pDY87   | $C_3(bbBeas)$ in YEpADH2p-URA3                   |               |
| pDY88   | $bbBeas-\Delta C_3(PmeI)$ in YEpADH2p-TRP1       |               |
| pDY92   | $C_1(bbBeas)$ in pJET1.2                         | 3, 5          |
| pDY93   | $C_1(bbBsls)$ in pJET1.2                         | 6, 7          |
| pDY100  | $C_1(bbBeas)$ in YEpADH2p-TRP1                   |               |
| pDY101  | $C_1(bbBsls)$ in YEpADH2p-TRP1                   |               |
| pDY104  | $T_{2a}T_{2b}C_3(bbBeas)$ in pJET1.2             | 8, 2          |
| pDY105  | $T_{2b}C_3(bbBeas)$ in pJET1.2                   | 9, 2          |
| pDY106  | $C_3(bbBsls)$ in pJET1.2                         | 10, 16        |
| pDY108  | $bbBeas-\Delta T_{2a}T_{2b}C_3$ in pJET1.2       | 3, 11         |
| pDY109  | $bbBeas-\Delta C_1$ in pJET1.2                   | 12, 2         |
| pDY111  | $bbBeas-\Delta T_{2b}C_3$ in pJET1.2             | 3, 13         |
| pDY112  | $bbBsls-\Delta C_3$ in pJET1.2                   | 15, 14        |
| pDY113  | $bbBsls-\Delta C_1$ in pJET1.2                   | 17, 18        |
| pDY114  | $T_{2a}T_{2b}C_3(bbBeas)$ in YEpADH2p-URA3       |               |
| pDY115  | $T_{2b}C_3(bbBeas)$ in YEpADH2p-URA3             |               |
| pDY116  | $C_3(bbBsls)$ in YEpADH2p-TRP1                   |               |
| pDY117  | $bbBeas-\Delta C_1$ in YEpADH2p-URA3             |               |
| pDY118  | $bbBeas-\Delta T_{2b}C_3$ in YEpADH2p-TRP1       |               |
| pDY119  | $bbBsls-\Delta C_3$ in YEpADH2p-URA3             |               |
| pDY121  | $bbBsls-\Delta C_1$ in YEpADH2p-URA3             |               |
| pDY122  | $bbBeas-\Delta T_{2a}T_{2b}C_3$ in YEpADH2p-TRP1 |               |
| pDY135  | $bbBsls-\Delta T_{2a}T_{2b}C_3$ in pJET1.2       | 19, 20        |
| pDY136  | $T_{2a}T_{2b}C_3(bbBsls)$ in pJET1.2             | 21, 22        |
| pDY137  | $T_{2b}C_3(bbBsls)$ in pJET1.2                   | 22, 23        |
| pDY138  | $bbBsls-\Delta T_{2b}C_3$ in pJET1.2             | 19, 24        |
| pDY139  | $T_{2b}C_3(bbBsls)$ in YEpADH2p-TRP1             |               |
| pDY140  | $T_{2a}T_{2b}C_3(bbBsls)$ in YEpADH2p-TRP1       |               |
| pDY141  | $bbBsls-\Delta T_{2b}C_3$ in YEpADH2p-URA3       |               |
| pDY150  | $bbBsls-\Delta T_{2a}T_{2b}C_3$ in YEpADH2p-URA3 |               |
| pDY145  | $bbBeas-H2901A$ in YEpADH2p-URA3                 | 25, 26        |
| pDY149  | $bbBeas-D179A$ in YEpADH2p-URA3                  | 27, 28        |
| pDY151  | $bbBsls-H170A$ in YEpADH2p-URA3                  | 29, 30        |
| pDY152  | $bbBsls-H2861A$ in YEpADH2p-URA3                 | 31, 32        |
| pDY158  | $bbBeas-S2591A$ in YEpADH2p-URA3                 | 33, 34        |
| pDY161  | $bbBsls-D174A$ in YEpADH2p-URA3                  | 35, 36        |
| pDY162  | $bbBeas-S2688A$ in YEpADH2p-URA3                 | 37, 38        |
| pDY165  | $bbBeas-\Delta T_{2a}$ in pJET1.2                | 41, 39, 40, 2 |
| pDY173  | $bbBeas-\Delta T_{2a}$ in YEpADH2p-URA3          |               |
| pDY183  | $bbBeas-S2591A$ in pDY162                        | 33, 34        |

---

|        |                                                                          |                |
|--------|--------------------------------------------------------------------------|----------------|
| pDY188 | <i>bbBeas</i> with $T_{2a}T_{2b}C_{3(bbBsIs)}$ in pJET1.2                | 41, 43, 42, 18 |
| pDY189 | <i>bbBeas</i> with $T_{2b}C_{3(bbBsIs)}$ in pJET1.2                      | 41, 45, 44, 18 |
| pDY190 | <i>bbBeas</i> with $C_{3(bbBsIs)}$ in pJET1.2                            | 41, 47, 46, 18 |
| pDY191 | <i>bbBsIs</i> with $T_{2a}T_{2b}C_{3(bbBeas)}$ in pJET1.2                | 48, 50, 49, 2  |
| pDY192 | <i>bbBsIs</i> with $T_{2b}C_{3(bbBeas)}$ in pJET1.2                      | 48, 52, 51, 2  |
| pDY201 | $C_1A_1T_1C_2A_2MT_{(bbBeas)}T_{2a}T_{2b}C_{3(bbBsIs)}$ in YEpADH2p-URA3 |                |
| pDY203 | $C_1A_1T_1C_2A_2MTT_{2a}T_{2b(bbBeas)}-C_{3(bbBsIs)}$ in YEpADH2p-URA3   |                |
| pDY204 | $C_1A_1T_1C_2A_2MTT_{2a(bbBeas)}T_{2b}C_{3(bbBsIs)}$ in YEpADH2p-URA3    |                |
| pDY205 | $C_1A_1T_1C_2A_2MTT_{2a(bbBsIs)}T_{2b}C_{3(bbBeas)}$ in YEpADH2p-URA3    |                |
| pDY215 | $C_1A_1T_1C_2A_2MT_{(bbBsIs)}T_{2a}T_{2b}C_{3(bbBeas)}$ in YEpADH2p-URA3 |                |
| pDY222 | <i>bbBsIs</i> with $C_{3(bbBeas)}$ in pJET1.2                            | 48, 54, 53, 2  |
| pDY224 | $C_1A_1T_1C_2A_2MTT_{2a}T_{2b(bbBsIs)}-C_{3(bbBeas)}$ in YEpADH2p-URA3   |                |
| pFC1   | $C_1(bbBeas)$ in pJET1.2                                                 | 3, 55          |
| pFC2   | $C_3(bbBeas)$ in pJET1.2                                                 | 56, 57         |
| pFC3   | $C_1(bbBeas)$ in pET28a                                                  |                |
| pFC4   | $C_3(bbBeas)$ in pET28a                                                  |                |
| pFC9   | $C_3(bbBsIs)$ in pJET1.2                                                 | 58, 59         |
| pFC11  | $C_3(bbBsIs)$ in pET28a                                                  |                |
| pFC44  | $C_3(bbBeas-H2901A)$ in pJET1.2                                          | 56, 57         |
| pFC46  | $C_3(bbBeas-H2901A)$ in pET28a                                           |                |
| pFC62  | $C_2(bbBeas)$ in pJET1.2                                                 | 60, 61         |
| pFC63  | $C_2(bbBeas)$ in pET28a                                                  |                |
| pZJ134 | $MT_{(bbBeas)}$ in pJET1.2                                               | 62, 63         |
| pJCZ21 | $MT_{(bbBeas)}$ in pET28a                                                |                |

---
